## **Paradigms about the COVID-2 pandemic: knowledge, attitudes and practices from medical students**

Lincango-Naranjo Eddy, MD<sup>1,6</sup>, Solis-Pazmino Paola, MD<sup>2</sup>, Rodriguez-Villafuerte Santiago, PhD<sup>3-4</sup>, Lincango-Naranjo Jose<sup>5</sup>, Vinueza-Moreano Paul, MD<sup>6</sup>, Barberis-Barcia Giuseppe, MD<sup>6</sup>, Ruiz-Sosa Carlos, MD<sup>6</sup>, Rojas-Velasco Giovanni, PhD<sup>6,7</sup>, Espinoza-Suarez Nataly, MD<sup>1</sup>, Golembiewski, Elizabeth, PhD<sup>1</sup>, Soto-Becerra Percy, MD<sup>8</sup>.

<sup>1</sup>Knowledge and Evaluation Research Unit, Mayo Clinic, Rochester, Minnesota, 55905, USA.

<sup>2</sup>Department of Otolaryngology-Head and Neck Surgery, School of Medicine, Stanford University, Stanford, California, USA.

<sup>3</sup>Facultad de Medicina, Programa de Pós-graduação em Hepatologia, Universidade Federal de Ciências da Saúde de Porto Alegre (UFCSPA), Porto Alegre, RS, Brasil.

<sup>4</sup>Hospital Vozandes Quito, Quito, Ecuador.

<sup>5</sup>Universidad de las Fuerzas Armadas, Quito, Ecuador.

<sup>6</sup>Facultad de Ciencias Médicas, Universidad Central del Ecuador, Quito-Ecuador.

<sup>7</sup>Universidad de Sao Paulo.

<sup>8</sup>Facultad de Administración y Salud Pública, Universidad Peruana Cayetano Heredia, Lima, Perú

### **Corresponding author:**

Lincango-Naranjo Eddy

Av. Yaguachi y Av. Iquique, Quito, 170403, Ecuador

[Eddypa95@gmail.com](mailto:Eddypa95@gmail.com) / [Lincango.eddy@mayo.edu](mailto:Lincango.eddy@mayo.edu)

+593 983510286

## Abstract

**Background:** As the disease caused by the new coronavirus has spread globally, economic instability in healthcare systems has been significant, and the lack of knowledge, attitudes and practices among people has led the magnification of this disease. This reality is more accentuated especially in Ecuador, where, although many healthcare workers have been called to help in the regions most affected; the shortage of them combined with cultural and macroeconomic factors have led Ecuador to face the most aggressive outbreak in Latin America. In this context, the participation on the front line of the last year medical students are indispensable. For that reason, appropriate training on COVID-19 to last year medical students is an urgent need that universities and health systems must guarantee. We aimed to describe the knowledge, attitudes and practices in Ecuadorian last year medical students in order to identify the knowledge gaps, perceptions and behavior patterns, which could guide the design of better medical educational curricula on COVID-19.

**Methods:** This was a cross-sectional 33-item online survey conducted between April 6 to April 20 assessing the knowledge, attitudes, and practices toward the diagnosis, treatment, prevention, and prognosis toward COVID-19 in Ecuadorian last year medical students. It was sent by email and by Facebook and WhatsApp.

**Results:** A total of 309 students answered the survey. 88% (274/309) of students scored high about knowledge of the disease ( $\geq 16$  points). The majority of students were pessimistic about possible government actions, which is reflected in the negative attitude towards the control of the COVID-19 in Ecuador and volunteering during the outbreak in 77% (238/309) and 58%

(179/309) of the students, respectively. Moreover 91% (280/309) of students said they did not have adequate protective equipment, neither training in their health facilities (49%, 152/309).

**Conclusions:** The high level of students' knowledge is an important opportunity to strengthen, improve and advance their training toward COVID-19. Creating a national curriculum may be one of the most effective ways for all students to be trained. Hopefully with this, negative attitudes will change and students will be better qualified.

**Keywords:** Ecuador, medical students, COVID-19.

## Introduction

The severe acute respiratory syndrome coronavirus 2 (SARS-CoV-2) is a respiratory virus that (1) causes coronavirus disease 2019 (COVID-19) a potentially lethal infectious condition. Due to its high infectivity and transmissibility, SARS-CoV-2 has quickly caused a global pandemic (2) that started in China on November 2019. In February 29, 2020, the first case of COVID-19 was reported in Ecuador (3) and, a few weeks later this country has faced the most aggressive COVID-19 outbreak in Latin America (4,5). The number of COVID-19 cases and deaths in Ecuador was gradually increasing, with 29 559 cases out of 17 468 429 inhabitants and 2 127 deaths reported until May 5 (6,7) making the incidence rate of cases per population in Ecuador one of the greatest in South America (3,4). This pandemic generated a worldwide lockdown, and several actions have been taken by the governments. In Ecuador, since March 15 the government decided to shelter in place its inhabitants, close schools, shut down places for social gathering, including restaurants, bars, movie theaters, concerts, sporting events, etc. (3). However, those interventions helped partially, and the number of cases increased continuously, being the Province of Guayas the most affected. For that reason, many healthcare workers (HCWs) have been called to help the overwhelmed COVID-19 patients in this province.

HCWs are on the front line of COVID-19 outbreak and, as such, are at higher risk of contracting the virus. Around the world, a large number of them have been infected with COVID-19 (8,9) and thousands have died (10). In Ecuador alone, 1600 HCWs have been tested positive for the virus and 24 have died as of this writing (6). Being a HCW not only involve licensed professionals, such as doctors, nurses, pharmacists, and dentists but also medical students,

specifically those who are in their last year doing a clinical internship. During this last stage of their medical training, Ecuadorian medical students participate in a wide range of key activities within the health system, such as the comprehensive care of people in their life, family and community cycle; the education aimed at health promotion and disease prevention; the administrative support in health units; and even in planning of health services, policies, programs and projects aimed at specific groups and community benefits. Thus, the last year is essential for students to integrate and consolidate the knowledge they have acquired during the previous years. They have little experience managing patients and can easily make mistakes. This lack of experience increases their chance of infection. If they are infected the likelihood of develop deadly forms of COVID-19 is low, but it is high for developing an asymptomatic disease, and become vectors which exacerbates the epidemiological burden of the disease.

At present, since no treatment or vaccine is available for COVID-19 and patients are managed with supportive care, applying preventive measures to control COVID-19 is the most critical intervention. Organizations such as the CDC and WHO have published recommendations for the prevention and control of COVID-19 for healthcare workers (11,12). Knowing, having positive attitudes to these guidelines, and adhering to the practice of these measures could be essential to avoid preventable deaths and facilitate outbreak management. In our study, we assessed the knowledge, attitudes, and practices of SARS-cov2 infection among Ecuadorian last-year medical students toward the diagnosis, treatment, prevention, and prognosis of COVID-19, in order to identify the knowledge gaps, perceptions and behavior patterns, which could guide the design of better medical educational curricula on COVID-19.

## **Methods**

### **Setting and participants**

A cross-sectional online survey was fielded from April 6 to April 20. Participants were medical students enrolled in their last year of medical school in Ecuador and only those who agreed to participate and completed the survey were included. The secretary of the Association of Ecuadorian Faculties of Medical and Health sciences (AFEME, in Spanish) sent the survey by email to the deans of the 22 universities, with a medical school, existing in Ecuador (13). Later the deans sent the survey to each last year medical student. The survey was also sent by the coauthors' Facebook and WhatsApp (V-M.P., R-S.C., B-B.G.).

From the total of 3 000 last year medical students in Ecuador (14), with 50% expected sample proportion, 95% confidence interval, 5% of margin of error and 10% expected loss ratio, a planned sample size of 379 was calculated using App4Stats (15).

### **COVID-19 survey**

The survey was adapted from the information given by CDC, WHO (11,12), and other COVID-19 surveys (16,17). It was developed and fielded in Spanish and only translated to English for publication purposes. Data were collected using a 33-item online survey that evaluated the medical students' knowledge, attitudes, and practices (KAP) towards COVID-19 (Table 2). In order to reduce the chance of missing data, progression to the next question was not possible before answer to the preceding question had been registered.

Since this questionnaire was created only for the purpose of this project, the questioner was reviewed for face validity assessment by three experts, one in medical education, one in infectious diseases, and one in biostatistics. This section of the project was carried out to identify key issues that may affect the integrity of last year medical students during the outbreak. After 1 week of proofreading the questionnaire and organizing the questions by sections, we pilot-tested it online with 30 last-year medical students. We interviewed these students to find out their opinions. At the end we edited some questions to improve the instrument and create a new version. These responses and students were excluded from the original study. The internal consistency of each domain was calculated using Cronbach's alpha (knowledge 0.40, attitude 0.46 and practice 0.36). To gather information, we developed an online questionnaire using Google forms. (Supplementary Material)

### **Domain: Knowledge**

The knowledge domain was composed of 23 questions to evaluate students' knowledge about COVID-19, including its virology, diagnosis and clinical management, prevention, and relevant infection control measures. For all questions in this domain, respondents were asked to respond 'true', 'false' or 'not sure'. A correct answer was assigned 1 point and an incorrect answer or a 'not sure' response was assigned 0 points. For each respondent, we categorized a knowledge score of  $\geq 16$  points out of 23 possible points ( $\geq 70\%$  correct) as "high knowledge". Score of  $< 16$  points ( $< 70\%$  correct) were categorized as "low knowledge". The cut-off point is based on the academic approval regulations of the Universidad Central del Ecuador, which considers a demanding cut-off point of 70% of the final grade, which is the minimum necessary to consider a high level of knowledge (18).

### **Domain: Attitudes**

In the attitude domain, students were asked four questions about their opinions toward volunteering at a health facility during the COVID-19 outbreak, and disease control in hospitals in Ecuador. All questions in the attitude domain had “yes” or “no” response options.

### **Domain: Practices**

Finally, the practices domain was composed of six questions regarding the students’ use of guidelines, trainings and conferences, hand washing, and scientific searching for information and type of sources consulted. This domain included four questions that required a ‘yes’ or ‘no’ response and two single select multiple choice questions.

### **Demographic characteristics**

In addition, we collected demographic information from respondents, including age, sex, name and location of their university, and the current hospital and department where students were being trained.

### **Data management**

Demographic characteristics data were managed as follows: universities were classified as public and private according to the secretariat of higher education science and technology (Senescyt) (19) from Ecuador; and hospital were grouped as public and private subsystems. The public system is comprised of facilities run by the Ministry of Public Health, the Ecuadorian Social Security Institute (which includes Rural Social Security, the Armed Forces, and the National Police), and the health services of some municipalities. The private system is comprised of health



insurance companies and prepaid plans for medicine providers (20). The rotation department was classified into clinic, surgical, gynecology and pediatrics, and the cities were grouped depending on the level of income reported in billions of dollars in 2018 according to INEC (21): Quito (more than 50 billion), Guayaquil (between 50 billion and 10 billion) others (less than 10 billion).

### **Statistical methods**

Descriptive analyses were performed by reporting the number and percentages for all categorical variables. Numerical values were reported as median and interquartile ranges. The normality of the variable was evaluated with the Kolmogorov Smirnov test. Knowledge scores, and attitudes according different general characteristics and practices' questions were compared with Chi-square test. Data were analyzed using IBM-SPSS version 19 (IBM, Ar-monk, NY, USA) and  $P < 0.05$  was considered statistically significant.

### **Ethical approval**

Consent from the participants was gained at the start of the questionnaire with an explanation of the aim of the study. Participants could continue to the full questionnaire only after responding (electronically) to an 'Agreement of Participation' assent form. All the questionnaires were anonymized, and no identifiable data was requested.

## Results

From April 6 to April 20, 309 (81.5%) out 379 (10.3% of 3 000) students answered the survey.

Demographic data of the study participants are shown in Table 1. Most of the students were women (56.3%, 174/309), between 23 and 25 years old (74.1%, 229/309) studied in Quito (61.4%, 190/309) and in a public university (68%, 210/309). 94% (291/309) of the students were currently training in a public hospital.

### Knowledge about COVID-19

The questionnaire shown in Table 2 was used to measure the KAP toward diagnosis, treatment, prevention, prognosis, and education of COVID-19. The median COVID-19 knowledge score was 17 (IQ: 16, 19, range: 12-22) and the proportion of high-level knowledge score ( $\geq 16$ ) was 88% (274/309). Out of 309 students 8% scored 20-23 points, 80.6% scored 16-19 points, and 11.4% scored 12-15 points.

Regarding each subtopic from knowledge questions, a minority of respondents (31.4%, 97/309) knew the subgenus to which the virus belonged and few students (68.6%, 212/309) were aware of the basic structure of the virus. Conversely, 91.9% (284/309) of respondents were aware that close contact with ill patients was the mode of transmission and that patients with the disease could be asymptomatic, 98.1% (284/309) realized that cough, fever, fatigue were the typical symptoms of the infection, and 96.8% (299/309) knew that real-time polymerase chain reaction (RT-PCR) testing of a respiratory specimen was used to diagnose COVID-19. Also, 97.1% (300/309) of respondents successfully answered that supportive treatment was the only treatment

available for patients with COVID-19 and 90.3% (279/309) knew that hand washing with an alcohol-based hand sanitizer and the use of a mask are the primary measures for preventing transmission. Other questions are detailed in table 2.

### **Attitudes toward COVID-19**

More than one half of respondents took a negative attitude toward volunteering at a health facility during the COVID-19 outbreak (57.9%, 179/309), and did not have confidence that the Ecuadorian health facilities and Ecuador can win the battle against COVID-19 (70.9%, 219/309 and 77%, 238/309, respectively). The vast majority of respondents thought that they are a potential source of contagion for their families (98.1%, 303/309).

By the other hand, only 3% (10/309) of the students had 4 positive attitudes, 10% (30/309) had 3 positive attitudes, 24% (73/309) had 2 positive attitudes, 28% (88/309) had 1 positive attitude and 30% (108/309) had no positive attitudes. (Figure 1)

### **Practices related to COVID-19.**

Only 50.83% (157/309) and 56.3% (174/309) of students reported that had any formal talks/training of infection control and their health facilities are following a guideline to control COVID-19. A small number of students reported that received all the necessary safeguards and personal protective equipment (9.4%, 29/309). Almost of students said that they proper hand washing more often (99%, 306/309) and obtained information on COVID-19 from reliable sources (77.3%, 239/309 from scientific articles and 3.2%, 10/309 from videoconferences). More than one half updated on the disease three times a week or more (64.4%, 199/309).

## Discussion

COVID-19 is a global pandemic that involves the entire population, especially health personnel. Last year medical students are a critical piece of health personnel because their role is no longer to be observant, but to be actively involved in patient care responsibilities (22–24). In our study we found that the majority (88%) of last year medical students had a high level of knowledge about this COVID-19. However, attitudes about control and voluntary participation during the COVID outbreak in Ecuador were negative (77% and 58%, respectively). Furthermore, we found evidence that the delivery of adequate personal protective equipment and implementation of trainings were poor, because 90% of the students indicated that they did not receive PPE and only 49% received training. To the best of our knowledge, this is the first study in Ecuador and Latin America examining KAP towards diagnosis, treatment, prevention, prognosis, and education of COVID-19 among last year medical students.

The high knowledge score is consistent with findings from recent survey of HCWs in other areas of the world (16,17,25), however, it is difficult to do comparisons because these studies used other definitions for establishing “high” level of knowledge. This high score could be attributed to the serious situation of the pandemic and the overwhelming articles published, online conferences and news reports on this public health emergency. However, a high score in theoretical knowledge is not *sine qua non* of good medical practice, because there are elements related to clinical practice and the patient care that evaluations cannot measure. For that reason, appropriate training is urgently necessary, but unfortunately this need is scarcely fulfilled by health facilities and/or universities from Ecuador with almost half medical student reporting not

have had formal training about COVID-19. Although, we do not have direct evidence of the magnitude of the deficit of training in other countries, similarities in medical education in Latin American lead us to suppose that the situation would be similar in the Region, which represents a concerning flaw in the fight against COVID-19. Future studies should assess these deficiencies in more Latin American Countries in order to identify training gaps to urgently improve.

By the other hand, the unique study that assessed the change in the education model was done in one health facility in Denmark, a developed country of Europe, and shows a timely change in the undergraduate medical curriculum in order to affront the pandemic of COVID-19 (26), characterized by the use of a digital platform including courses related COVID-19 such as ventilator therapy assistant and nursing assistant. Experiences like these shows that Ecuadorian medical students need more public health attention that allow them to continuing learning. Therefore, our evidence suggests that Ecuadorian last year medical students, as the future front line, won't be prepared to properly face the challenges of COVID-19 in daily clinical practice. It is big deal because medical students would cover and complement the shortage of HCWs that exists in Ecuador. According to the latest data reported by INEC (27) in 2018, there are 23 doctors and 14 nurses per 10 000 inhabitants, equal and less than the minimum established by the WHO (28) to provide essential health services to the population (23 skilled HCWs per 10 000). , The number of this "new doctors" (3 000) added to the existing doctors in Ecuador (39 908) (27), would raise the number of doctors per 10,000 inhabitants to 25.2, higher than the minimum established by the WHO. Hence the importance that, depending on the development of a new curriculum, the training of medical students would allow them to cover nursing and telemedicine tasks, which would have a positive impact in the fight against COVID-19, as demonstrated in

other countries where, to avoid the collapse of the health systems, the participation of medical students was requested, to collaborate in the triage and/or management of suspected or confirmed COVID-19 patients (29,30).

Based on similar studies on influenza and other infectious disease in Latin American medical students (31,32), where students had high level of knowledge of the disease, and were pessimistic about possible government actions, the finding of a high COVID-19 knowledge in Ecuadorian last-year medical students and their negative attitudes were expected. Perhaps the lack of adherence (33,34) to social distancing measures for people at risk and the isolation of positive cases, which is difficult in a country where cultural and economic inequalities have allowed people from informal jobs or underemployment not follow the recommendations; decades of poor political programming, reflected in the education budget reduction (35); and the lack of guidance and clinical supervision have made some last year medical students discourage the decision of be willing to work as a volunteer in a health facility during the COVID-19 outbreak, and think that Ecuador will not control the COVID-19 outbreak. Furthermore, the absence of official and unambiguous statements on indemnity, expected roles and responsibilities and contractual agreements would make it difficult for students to participate in Ecuador. Other possible explanation for these negative attitudes is the shortage of protective equipment and medical supplies (3), as we found that 90.6% of students said that do not have appropriate personal protective equipment.

We hope that the results of this study encourage the development of public health policies that improve the decision-making process against a disease without borders and promote the creation

of evidence-based national training curriculum against COVID-19, aimed at preparing and educating medical students. Moreover we believe that having adequate level of knowledge of COVID-19 will allow this type of programs to be implemented easily, which will be of benefit during this pandemic and for the future.

### **Limitations**

Our study has several limitations that should be discussed. The non-random sampling of this study could be a source of self-selection bias in this study. Although it is not possible to predict the direction of the bias, we believe that it is reasonable expect that knowledge could be overestimated if non-responders were mainly medical student with lower knowledge that decided not to participate. Similarly, negative attitudes and adequate behavioral patterns were likely to be underestimated due to people with positive attitude could be more optimistic to participate than pessimistic people. Future studies could address this limitation selecting a random sampling of medical students maybe through the use of institutional e-mails. Other limitation is the possibility of social desirability bias that could be affecting attitudes and behavioral patterns responses. Thus, we expected that negative attitudes and inadequate behavioral patterns are underestimated due to shame and suspicion in recognizing this pessimistic perspective. However, we think that the use of an anonymous virtual survey reduces the risk of this bias at least in the attitude assessment. Future studies could also introduce direct observation of practice in order to get better estimates of behavioral patterns. Despite of all these limitations, we consider that this study is a well first approximation to insights about the training needs of Ecuadorian medical students and could be useful to design a specific curriculum about COVID-19 for this important healthcare resource.

## **Conclusions**

As many middle-income countries, Ecuador has not operational readiness capacities and enabling function toward COVID-19(36), hence the high level of knowledge of the students is an important opportunity to take advantage of it and strengthen, improve and advance their training to prepare them toward COVID-19. Now is the time to develop plans for making that transition as safe as possible for students, medical teams, and, most importantly, for patients. Creating a national curriculum may be one of the most effective ways for all students to be trained. Students can receive online training specific to COVID-19 and disaster preparedness, and healthcare systems can develop workflows that integrate students where they can be most effective.

## **Author Approval**

All authors have seen and approved the manuscript.

## **Declaration of interests**

The authors have no conflicts of interest.

## **Role of the funding source**

The authors had no funding for this article.



## References

1. Zhu N, Zhang D, Wang W, Li X, Yang B, Song J, et al. A novel coronavirus from patients with pneumonia in China, 2019. *N Engl J Med*. 2020;382(8):727–33.
2. World Health Organization. Rolling updates on coronavirus disease (COVID-19) [Internet]. [cited 2020 Apr 4]. Available from: <https://www.who.int/emergencies/diseases/novel-coronavirus-2019/events-as-they-happen>
3. Hallo A, Rojas A, Hallo C. Perspective from Ecuador, the Second Country with More Confirmed Cases of Coronavirus Disease 2019 in South America: A Review. *Cureus*. 2020 Mar 28;
4. BBC NEWS. Coronavirus: why does Ecuador have the highest number of covid-19 infections and deaths per capita in South America? [Internet]. [cited 2020 Apr 21]. Available from: [https://www.bbc.com/mundo/noticias-america-latina-52036460?fbclid=IwAR1q4nT5bAoBeg3g\\_avKNDqWRtDKyRzgMN5u-qSrXUi2WZS2Kj4SMeyGweQ](https://www.bbc.com/mundo/noticias-america-latina-52036460?fbclid=IwAR1q4nT5bAoBeg3g_avKNDqWRtDKyRzgMN5u-qSrXUi2WZS2Kj4SMeyGweQ)
5. The New York Times. As Bodies Accumulate, So Do Fears of a High Coronavirus Toll in Ecuador - The New York Times [Internet]. [cited 2020 Apr 21]. Available from: <https://www.nytimes.com/2020/04/14/world/americas/coronavirus-Ecuador-guayaquil.html?searchResultPosition=2>
6. Ministerio de Salud Pública del Ecuador. Coronavirus COVID 19 [Internet]. [cited 2020 Apr 4]. Available from: <https://www.salud.gob.ec/coronavirus-covid-19/>
7. INEC. Population Accountant [Internet]. [cited 2020 Apr 5]. Available from: <https://www.ecuadorencifras.gob.ec/estadisticas/>

8. Novel Coronavirus Pneumonia Emergency Response Epidemiology Team. The epidemiological characteristics of an outbreak of 2019 novel coronavirus diseases (COVID-19) in China. *Zhonghua Liu Xing Bing Xue Za Zhi* [Internet]. 2020 Feb 17 [cited 2020 Apr 4];41(2):145–51. Available from: <http://www.ncbi.nlm.nih.gov/pubmed/32064853>
9. The Lancet. COVID-19: protecting health-care workers. *Lancet* [Internet]. 2020;395(10228):922. Available from: [http://dx.doi.org/10.1016/S0140-6736\(20\)30644-9](http://dx.doi.org/10.1016/S0140-6736(20)30644-9)
10. Medscape. In Memoriam: Healthcare Workers Who Have Died of COVID-19 [Internet]. [cited 2020 Apr 5]. Available from: [https://www.medscape.com/viewarticle/927976?src=soc\\_fb\\_200408\\_mscpedt\\_news\\_mds\\_cp\\_memoriam&faf=1](https://www.medscape.com/viewarticle/927976?src=soc_fb_200408_mscpedt_news_mds_cp_memoriam&faf=1)
11. CDC. Emergency Preparedness and Response [Internet]. [cited 2020 Apr 4]. Available from: <https://emergency.cdc.gov/han/han00427.asp>
12. World Health Organization. Infection prevention and control during health care when novel coronavirus (nCoV) infection is suspected [Internet]. [cited 2020 Apr 4]. Available from: [https://www.who.int/publications-detail/infection-prevention-and-control-during-health-care-when-novel-coronavirus-\(ncov\)-infection-is-suspected-20200125](https://www.who.int/publications-detail/infection-prevention-and-control-during-health-care-when-novel-coronavirus-(ncov)-infection-is-suspected-20200125)
13. Consejo de Aseguramiento de la Calidad de la Educacion Superior (Caces). Careears [Internet]. [cited 2020 May 15]. Available from: <https://www.caces.gob.ec/carreras/>
14. INEC. Statistics [Internet]. [cited 2020 Mar 23]. Available from: <https://www.ecuadorencifras.gob.ec/estadisticas/>

15. App4Stats – Bioestadística para estudios científicos [Internet]. [cited 2020 May 12]. Available from: <http://app4stats.com/>
16. Bhagavathula AS, Aldhaleei WA, Rahmani J, Mahabadi MA, Bandari DK. Novel Coronavirus (COVID-19) Knowledge and Perceptions: A Survey on Healthcare workers. medRxiv [Internet]. 2020;2020.03.09.20033381. Available from: <https://doi.org/10.1101/2020.03.09.20033381>
17. Huynh G, Nguyen T, Tran V, Vo K, Vo V, Pham L. Knowledge and attitude toward COVID-19 among healthcare workers at District 2 Hospital, Hospital, Ho Chi Minh City. Asian Pac J Trop Med. 2020;(April).
18. Universidad Central del Ecuador. Instruction for the student evaluation of grade [Internet]. [cited 2020 Dec 4]. Available from: <http://akacdn.uce.edu.ec/ares/w/facs/fo/pregrado/noticias/INSTRUCTIVO PARA LA EVALUACIÓN ESTUDIANTIL DE GRADO.pdf>
19. Secretaría de Educación Superior, Ciencia, Tecnología e Innovación (Senescyt) [Internet]. [cited 2020 Apr 22]. Available from: <https://www.educacionsuperior.gob.ec/>
20. Pan American Health Organization. Health in the Americas+, 2017 Edition. Summary: Regional Outlook and Country Profiles. 2017th ed. PAHO, editor. Washington, DC; 2017.
21. INEC. Main Data by Cities [Internet]. [cited 2020 Apr 23]. Available from: <https://www.ecuadorencifras.gob.ec/informacion-censal-por-provincias/>
22. Seiden SC, Galvan C, Lamm R. Role of medical students in preventing patient harm and enhancing patient safety. Qual Saf Heal Care. 2006;15(4):272–6.

23. Miller DG, Pierson L, Doernberg S. The Role of Medical Students During the COVID-19 Pandemic. *Ann Intern Med.* 2020;(April):19–21.
24. Gonzalo JD, Dekhtyar M, Hawkins RE, Wolpaw DR. How Can Medical Students Add Value? Identifying Roles, Barriers, and Strategies to Advance the Value of Undergraduate Medical Education to Patient Care and the Health System. *Acad Med.* 2017;92(9):1294–301.
25. Taghrir MH, Borazjani R, Shiraly R. COVID-19 and Iranian Medical Students; A Survey on Their Related-Knowledge, Preventive Behaviors and Risk Perception. *Arch Iran Med* [Internet]. 2020;23(4):249–54. Available from: <http://www.ncbi.nlm.nih.gov/pubmed/32271598>
26. Rasmussen S, Sperling P, Sã M, Emmersen J, Andersen S. Medical students for health-care staff shortages during the COVID-19 pandemic. *Lancet* [Internet]. 2020;6736(20):23–4. Available from: [http://dx.doi.org/10.1016/S0140-6736\(20\)30923-5](http://dx.doi.org/10.1016/S0140-6736(20)30923-5)
27. INEC. Health Activities and Resources [Internet]. [cited 2020 May 15]. Available from: <https://www.ecuadorencifras.gob.ec/actividades-y-recursos-de-salud/>
28. World Health Organization. Global strategy on human resources for health: Workforce 2030 (draft 1.0 submitted to the Executive Board (138th session) [Internet]. [cited 2020 May 15]. Available from: [https://www.who.int/hrh/resources/global\\_strategyHRH.pdf?ua=1](https://www.who.int/hrh/resources/global_strategyHRH.pdf?ua=1)
29. Read KJ. Rapid response to: Covid-19: UK could delay non-urgent care and call doctors back from leave and retirement. *BMJ.* 2020 Mar 3;368:m854.

30. Stokes DC. Senior Medical Students in the COVID-19 Response: An opportunity to be proactive. *Acad Emerg Med* [Internet]. 2020;n/a(n/a). Available from: <https://doi.org/10.1111/acem.13972><http://doi.wiley.com/10.1111/acem.13972>
31. Rios-González CM, De Benedictis-Serrano GA, Flores-Enríquez JF, Chirino-Caicedo AD. Knowledge, attitudes and practices about the Oropouche, in medical students of Latin America, 2017. *Rev del Inst Med Trop*. 2017;12(2):14–22.
32. Real-Cotto JJ, Hernández-Navarro MI, Jaramillo-Feijoo LE, Guerrero-Lapo GE, Ordoñez-Sánchez JL, Idrovo-Castro KJ. Knowledge about influenza-like illnesses in medical students at Guayaquil University, Ecuador. *Edumecentro*. 2019;11(2):5–18.
33. El Comercio. 14 people who broke the isolation in Samborondón comply with the measure in two hotels in Guayaquil [Internet]. [cited 2020 May 12]. Available from: <https://www.elcomercio.com/actualidad/personas-incumplimiento-aislamiento-samborondon-guayaquil.html>
34. El Comercio. Informal trade and insecurity are reported on three streets in the Historic Center of Quito, despite restrictions [Internet]. [cited 2020 May 12]. Available from: <https://www.elcomercio.com/actualidad/informales-incidentes-centro-quito-restricciones.html>
35. El Comercio. About USD 100 million less in the budget of 32 universities and polytechnics, by covid-19. [Internet]. [cited 2020 May 12]. Available from: <https://www.elcomercio.com/actualidad/presupuesto-universidades-recorte-coronavirus-emergencia.html>
36. Kandel N, Chungong S, Omaar A, Xing J. Health security capacities in the context of

COVID-19 outbreak: an analysis of International Health Regulations annual report data from 182 countries. Lancet [Internet]. 2020;6736(20):1–7. Available from: <http://www.ncbi.nlm.nih.gov/pubmed/32199075> <https://linkinghub.elsevier.com/retrieve/pii/S0140673620305535>

## Tables

**Table 1 Demographic characteristics**

| <b>Total participant (n = 309)</b> |            | <b>n (%)</b>          |          |
|------------------------------------|------------|-----------------------|----------|
| <b>Age</b>                         |            | median: 24, IQ: 16-19 |          |
| <b>Sex</b>                         |            | ...                   | ...      |
|                                    | Female     | 174                   | (56.3%)  |
|                                    | Male       | 135                   | (43.7%)  |
| <b>Study city</b>                  |            | ...                   | ...      |
|                                    | Quito      | 190                   | (61.4%)  |
|                                    | Guayaquil  | 19                    | (6.14%)  |
|                                    | Others*    | 100                   | (32.46%) |
| <b>University</b>                  |            | ...                   | ...      |
|                                    | Public     | 210                   | (67.9%)  |
|                                    | Private    | 99                    | (32.1%)  |
| <b>Hospital type</b>               |            | ...                   | ...      |
|                                    | Public     | 291                   | (94.18%) |
|                                    | Private    | 18                    | (5.82%)  |
| <b>Department</b>                  |            | ...                   | ...      |
|                                    | Surgery    | 38                    | (12.3%)  |
|                                    | Pediatrics | 51                    | (16.5%)  |
|                                    | Gynecology | 54                    | (17.4%)  |
|                                    | Clinic     | 166                   | (53.8%)  |

\* Other cities included the following respondents: Cuenca: 34, Ambato 23; Manta: 18; Esmeraldas: 8; Tulcan: 5; Ibarra: 4; Riobamba: 3; Latacunga: 1; Loja: 1; Machala: 1; Quevedo: 1; Santa Elena: 1.

**Table 2 Descriptive statistics for survey responses**

| Total participants (n = 309)                                                                                                                                                                                                                                                                                                                                                        | Correct, n (%) |         | Incorrect, n (%) |         |
|-------------------------------------------------------------------------------------------------------------------------------------------------------------------------------------------------------------------------------------------------------------------------------------------------------------------------------------------------------------------------------------|----------------|---------|------------------|---------|
| <b>Knowledge domain</b>                                                                                                                                                                                                                                                                                                                                                             | ...            | ...     | ...              | ...     |
| General knowledge                                                                                                                                                                                                                                                                                                                                                                   | ...            | ...     | ...              | ...     |
| 1. Is SARS-CoV 2 a new coronavirus identified at the end of 2019, and when it infects humans, causes acute respiratory infection?                                                                                                                                                                                                                                                   | 298            | (96.4%) | 11               | (3.6%)  |
| 2. Is SARS-CoV2 a positive-sense single-stranded RNA virus?                                                                                                                                                                                                                                                                                                                         | 207            | (67.0%) | 102              | (33%)   |
| 3. SARS-CoV-2 is a member of the subgenus Sarbecovirus (beta-CoV B lineage).                                                                                                                                                                                                                                                                                                        | 97             | (31.4%) | 212              | (68.6%) |
| 4. Can SARS-CoV 2 live for some time on some surfaces?                                                                                                                                                                                                                                                                                                                              | 306            | (99%)   | 3                | (1%)    |
| 5. Not everyone with COVID-2019 will develop serious cases. People who have the following characteristics: age over 65 years, have comorbidities and obese are more likely to be serious cases.                                                                                                                                                                                     | 302            | (97.7%) | 7                | (2.3%)  |
| 6. Would being in contact with your pets lead to SARS-CoV 2 virus infection?                                                                                                                                                                                                                                                                                                        | 304            | (98.4%) | 5                | (1.6%)  |
| 7. Do you think SARS-CoV 2 stays in the air for 3 hours?                                                                                                                                                                                                                                                                                                                            | 143            | (46.3%) | 166              | (53.7%) |
| Diagnosis                                                                                                                                                                                                                                                                                                                                                                           | ...            | ...     | ...              | ...     |
| 8. Are the most prevalent symptoms of COVID-19: fever, cough and fatigue?                                                                                                                                                                                                                                                                                                           | 303            | (98.1%) | 6                | (1.9%)  |
| 9. Is the main incubation period for COVID-19 1-30 days?                                                                                                                                                                                                                                                                                                                            | 225            | (72.8%) | 84               | (27.2%) |
| 10. Is the main transmission mechanism of SARS-CoV-2, by close person-to-person contact who are infected with the virus, whether symptomatic or asymptomatic?                                                                                                                                                                                                                       | 284            | (91.9%) | 25               | (8.1%)  |
| 11. Is the diagnosis for COVID-19 recommended by the WHO made by a rapid test?                                                                                                                                                                                                                                                                                                      | 96             | (31.1%) | 213              | (68.9%) |
| 12. Is the diagnosis for COVID-19 recommended by the WHO made by the polymerase chain reaction (RT-PCR) test of the nasopharyngeal swab?                                                                                                                                                                                                                                            | 299            | (96.8%) | 10               | (3.2%)  |
| 13. Suspicious case of COVID-19, is defined as any patient who meets the clinical picture of acute respiratory syndrome (fever, cough, dyspnea, fatigue), and / or epidemiological criteria (being in contact with a suspected or confirmed case of COVID 19, travel or residence in area with active infections in the last 14 days), but without confirmation by laboratory test. | 300            | (97.1%) | 9                | (2.9%)  |



|                                     |                                                                                                                                                                                                                                                                     |     |                   |     |                  |
|-------------------------------------|---------------------------------------------------------------------------------------------------------------------------------------------------------------------------------------------------------------------------------------------------------------------|-----|-------------------|-----|------------------|
|                                     | 14. Confirmed case of COVID-19, is defined as any patient who meets the clinical picture of acute respiratory syndrome and / or epidemiological criteria confirmed by laboratory testing.                                                                           | 293 | (94.8%)           | 16  | (5.2%)           |
| Treatment                           |                                                                                                                                                                                                                                                                     | ... | ...               | ... | ...              |
|                                     | 15. There is currently no effective cure for COVID-2019, but early supportive and symptomatic treatment can help most patients recover from infection.                                                                                                              | 300 | (97.1%)           | 9   | (2.9%)           |
|                                     | 16. The use of chloroquine is recommended as prophylaxis for COVID-2019                                                                                                                                                                                             | 274 | (88.7%)           | 35  | (11.3%)          |
| Prevention                          |                                                                                                                                                                                                                                                                     | ... | ...               | ... | ...              |
|                                     | 17. Hand hygiene should be performed for more than 20 seconds, mainly hand washing with soap, although 75-95% alcohol gel can also be used.                                                                                                                         | 279 | (90.3%)           | 30  | (9.7%)           |
|                                     | 18. The personal protective equipment recommended by the WHO, for the care of a suspected or confirmed case of COVID-19, without aerosol-generating procedures, includes: hand hygiene, N95 mask, gloves, gown, and protective glasses.                             | 30  | (9.7%)            | 279 | (90.3%)          |
|                                     | 19. The use of a mask and the recommendation of distance between patients and health personnel as far as possible, is due to the fact that the macroparticles generated by coughs or sneezes and therefore potential virus transporters spread up to 2 meters away. | 279 | (89%)             | 34  | (11%)            |
|                                     | 20. Do you think that the life time of the N95 mask is 7 days?                                                                                                                                                                                                      | 55  | (17.8%)           | 254 | (82.2%)          |
|                                     | 21. Isolation is an effective way to reduce the spread of the virus.                                                                                                                                                                                                | 304 | (98.4%)           | 5   | (1.6%)           |
| Prognosis                           |                                                                                                                                                                                                                                                                     | ... | ...               | ... | ...              |
|                                     | 22. Can patients affected by COVID-19 recover from the disease?                                                                                                                                                                                                     | 304 | (98.4%)           | 5   | (1.6%)           |
|                                     | 23. Can people recovered from the disease still transfer or spread it?                                                                                                                                                                                              | 192 | (62.2%)           | 117 | (37.9%)          |
| <b>Total knowledge score, n (%)</b> |                                                                                                                                                                                                                                                                     |     |                   |     |                  |
|                                     | ≥ 16 correct answers = high score                                                                                                                                                                                                                                   | 274 | (88.7%)           |     |                  |
|                                     | 20 - 23 correct answers                                                                                                                                                                                                                                             | 25  | (8%)              |     |                  |
|                                     | 16 - 19 correct answers                                                                                                                                                                                                                                             | 249 | (80.6%)           |     |                  |
|                                     | 12 - 15 correct answers                                                                                                                                                                                                                                             | 35  | (11.4%)           |     |                  |
| <b>Attitude domain</b>              |                                                                                                                                                                                                                                                                     |     | <b>Yes, n (%)</b> |     | <b>No, n (%)</b> |
|                                     | 24. Would you be willing to volunteer at a health facility during the COVID-19 outbreak?                                                                                                                                                                            | 130 | (42.1%)           | 179 | (57.9%)          |

|                                                                                 |     |         |     |         |
|---------------------------------------------------------------------------------|-----|---------|-----|---------|
| 25. Do you think that your health facility is prepared for a COVID-19 outbreak? | 90  | (29.1%) | 219 | (70.9%) |
| 26. Do you agree that COVID-19 will be controlled in Ecuador?                   | 71  | (23.0%) | 238 | (77.0%) |
| 27. Do you think that you are a potential source of contagion for your family?  | 303 | (98.1%) | 6   | (1.9%)  |

**Practice domain**

|                                                                                                                                                     |                     |         |     |         |
|-----------------------------------------------------------------------------------------------------------------------------------------------------|---------------------|---------|-----|---------|
| 28. Is your health facility following a protocol or guideline to control COVID-19?                                                                  | 174                 | (56.3%) | 135 | (43.7%) |
| 29. Do you have all the necessary safeguards and personal protective equipment for the care of COVID-19 patients delivered by your health facility? | 29                  | (9.4%)  | 280 | (90.6%) |
| 30. Are you having conferences or talks/trainings on COVID-19 (diagnosis, handling of samples and biosecurity) in your health facility?             | 157                 | (50.8%) | 152 | (49.%)  |
| 31. Since the start of the pandemic, do you do proper hand washing more often?                                                                      | 306                 | (99%)   | 3   | (1%)    |
| 32. How often are you looking for active information to stay informed about the SARS-CoV 2 pandemic?, n (%)                                         | Daily               |         | 120 | (38.8%) |
|                                                                                                                                                     | Three times a week  |         | 79  | (25.6%) |
|                                                                                                                                                     | Twice a week        |         | 63  | (20.4%) |
|                                                                                                                                                     | Once a week         |         | 41  | (13.3%) |
|                                                                                                                                                     | It doesn't          |         | 6   | (1.9%)  |
| 33. Most of the information you get about COVID-19 is from?, n (%)                                                                                  | Scientific articles |         | 239 | (77.3%) |
|                                                                                                                                                     | Videoconferences    |         | 10  | (3.2%)  |
|                                                                                                                                                     | News                |         | 49  | (15.9%) |
|                                                                                                                                                     | Social media        |         | 11  | (3.4%)  |
